# Supplementary material for: Distribution of Abdominal Obesity and Fitness Level in Overweight and Obese Korean Adults
Source: Hindawi journal article supplement (doi:10.1155/2014/854392), 2014-01-01
Supplement: f1 [file 854392.f1.pdf]

## Supplementary table 1.

### Correlation coefficients between fitness level (recovery heart rate) and cardiometabolic characteristics and abdominal adiposity (VAT, SAT, and the VAT/SAT ratio) in men

|                                | VAT     | SAT     | VAT/SAT ratio |
|--------------------------------|---------|---------|---------------|
| Waist (cm)                     | 0.373** | 0.747** | 0.024         |
| Waist-to-hip ratio             | 0.195   | 0.293** | 0.106         |
| Mean BP(mmHg)                  | -0.014  | -0.084  | 0.007         |
| Physical activity (MET-h/week) | -0.036  | 0.034   | -0.002        |
| Fasting glucose (mg/dL)        | 0.200   | 0.218*  | 0.008         |
| Fasting insulin( $\mu$ U/mL)   | 0.103*  | 0.045   | 0.146         |
| HOMA-IR                        | 0.088   | 0.007   | 0.157         |
| Cholesterol (mg/dL)            | 0.156   | 0.135   | 0.074         |
| Triglyceride (mg/dL)           | 0.146   | 0.004   | 0.197*        |
| LDL (mg/dL)                    | 0.088   | 0.136   | 0.013         |
| HDL (mg/dL)                    | -0.108  | 0.019   | -0.013        |
| hsCRP (mg/L)                   | 0.036** | 0.195   | 0.252*        |
| Recovery heart rate            | 0.340** | 0.102   | 0.288**       |

Abbreviations: VAT, visceral adipose tissue; SAT, subcutaneous adipose tissue; VAT/SAT ratio, visceral-to-subcutaneous adipose tissue ratio; BMI, body mass index; BP, blood pressure; MET-h/week, metabolic equivalents hour per week; HOMA-IR, homeostasis model assessment of insulin resistance; LDL, low-density lipoprotein; HDL, high-density lipoprotein; hsCRP, highly sensitive C-reactive protein

\* $p < 0.05$ , \*\* $p < 0.01$ , calculated by Pearson's partial correlation adjusted for age and BMI

**Supplementary table 2.**

**Correlation coefficients between fitness level (recovery heart rate) and cardiometabolic characteristics and abdominal adiposity (VAT, SAT, and the VAT/SAT ratio) in women**

|                                | VAT     | SAT      | VAT/SAT ratio |
|--------------------------------|---------|----------|---------------|
| Waist (cm)                     | 0.225** | 0.557**  | 0.040         |
| Waist-to-hip ratio             | 0.279** | 0.053    | 0.185*        |
| Mean BP(mmHg)                  | 0.011   | -0.062   | 0.074         |
| Physical activity (MET-h/week) | -0.010  | 0.040    | 0.021         |
| Fasting glucose (mg/dL)        | 0.004   | 0.044    | -0.037        |
| Fasting insulin( $\mu$ U/mL)   | 0.187*  | 0.062    | 0.232**       |
| HOMA-IR                        | 0.142   | 0.069    | 0.139         |
| Cholesterol (mg/dL)            | 0.029   | 0.143    | 0.020         |
| Triglyceride (mg/dL)           | 0.087   | 0.017    | 0.193*        |
| LDL (mg/dL)                    | 0.026   | 0.051    | 0.013         |
| HDL (mg/dL)                    | -0.003  | -0.318** | -0.225*       |
| hsCRP (mg/L)                   | -0.015  | 0.165    | -0.118        |
| Recovery heart rate            | 0.162   | 0.022    | 0.170         |

Abbreviations: VAT, visceral adipose tissue; SAT, subcutaneous adipose tissue; VAT/SAT ratio, visceral-to-subcutaneous adipose tissue ratio; BMI, body mass index; BP, blood pressure; MET-h/week, metabolic equivalents hour per week; HOMA-IR, homeostasis model assessment of insulin resistance; LDL, low-density lipoprotein; HDL, high-density lipoprotein; hsCRP, highly sensitive C-reactive protein

\* $p < 0.05$ , \*\* $p < 0.01$ , calculated by Pearson's partial correlation adjusted for age and BMI
